# Supplementary material for: Properties of individual contrails: a compilation of observations and some comparisons
Source: Copernicus journal article supplement (doi:10.5194/acp-17-403-2017), 2017-01-10
Supplement: Supplementary file 1 [file ACTA_tau_percentiles.xlsx]

## Sheet: Tabelle1
NR_TAUW	age/s	y00_TAUW	y10_TAUW	y25_TAUW	y50_TAUW	y75_TAUW	y90_TAUW	y100_TAUW
2305	299.986	0.05	0.073	0.108	0.192	0.355	0.574	1.822
1746	599.975	0.05	0.073	0.109	0.191	0.352	0.553	1.509
1417	900.108	0.05	0.075	0.112	0.195	0.356	0.562	1.484
1237	1199.85	0.05	0.078	0.116	0.204	0.366	0.564	1.477
1069	1500.03	0.05	0.08	0.124	0.219	0.364	0.544	1.486
948	1800.17	0.05	0.08	0.124	0.22	0.373	0.559	1.458
1674	2238.34	0.05	0.083	0.127	0.223	0.375	0.562	1.458
741	2700.04	0.05	0.084	0.136	0.237	0.386	0.592	1.458
1365	3141.94	0.05	0.086	0.136	0.238	0.393	0.594	1.458
1226	3742.8	0.05	0.088	0.136	0.245	0.398	0.601	1.356
1594	4485.13	0.05	0.092	0.148	0.262	0.424	0.618	1.38
1381	5382.36	0.05	0.092	0.156	0.268	0.428	0.626	1.527
1547	6422.85	0.05	0.102	0.162	0.282	0.43	0.634	1.522
1290	7628.61	0.05	0.101	0.167	0.292	0.438	0.646	1.566
1285	8961.02	0.05	0.104	0.169	0.286	0.433	0.609	1.35
1244	10707.6	0.05	0.11	0.176	0.269	0.441	0.605	1.396
810	12813	0.05	0.106	0.175	0.268	0.434	0.599	1.482
666	15186	0.05	0.097	0.164	0.304	0.435	0.657	1.03
554	18154.8	0.053	0.112	0.157	0.272	0.49	0.702	1.021
378	21572.1	0.056	0.107	0.143	0.253	0.458	0.695	1.021
293	25602.6	0.088	0.132	0.158	0.261	0.477	0.77	1.162
198	30463.9	0.093	0.113	0.14	0.244	0.547	0.818	1.347
84	36079.3	0.081	0.1	0.112	0.148	0.637	0.695	0.79
50	43743.9	0.072	0.081	0.095	0.116	0.577	0.598	0.679
41	51237.2	0.084	0.098	0.102	0.115	0.448	0.513	0.54
37	62012.9	0.059	0.062	0.065	0.069	0.073	0.08	0.096
