# Supplementary material for: Properties of individual contrails: a compilation of observations and some comparisons
Source: Copernicus journal article supplement (doi:10.5194/acp-17-403-2017), 2017-01-10
Supplement: Supplementary file 2 [file COLI_Nov_2016.xlsx]

## Sheet: Tabelle1
insitu	remote	age/s	Project	prime author	Observation platform	ATYP	date	UTCtime/s	UTC end time/s	UTC hour	Place	Instrument and size range	d_min/um	d_max/um	max_value	obs_case	engine type	Number of engines	validated aircraft type=1	span/m	mass/Mg	m_F/(kg/km)	ETA	TAS/(m/s)	heading (0=northbound, 90=eastbound)/degree	age/s	empty	empty	empty	empty	empty	empty	empty	empty	empty	age min/s	age max/s	T/K	min/K	max/K	z_geo/km	min	max	FL/hft	p/hPa	min	max	ISSR/(1=yes, 0=no)	RHi/%
0	0	0.25	Henschel	auf Kampe (1942)	Henschel	HS-128	19411000				Germany	in-situ temperature and photos				unknown	Bramo-Fafnir motor	1	1	14.5	2.5	0.568182	0.4	66		0.25										0.2	0.3	228.15	231.15	223.15	8	7	10	319.962	356	350	360	1	100
1	0	1080	PMS	Knollenberg (1972)	NCAR Sabreliner	Sabreliner	19710919	43688		12:08:00	N_Colorado_S_Wyoming	Opticalspectr,75_1200 um				Sabreliner			1	13.56	6	1.26	0.3	150		1080										1050	1110	234.95	232.95	235.95				295	326	307.8		1	100
1	0	2340	PMS	Knollenberg (1972)	NCAR Sabreliner	Sabreliner	19710919	44940		12:29:00	N_Colorado_S_Wyoming	Opticalspectr,75_1200 um				Sabreliner			1	13.56	6	1.26	0.3	150		2340										2310	2370	234.95	232.95	235.95				295	326	307.8		1	100
0	1	115	CIAP	Hoshizaki (1974)	Groundbased Cameras	B-52	19720000				over San Francisco								estimated mF, Mass	56.4	100	7	0.28	230		115										110	120	205			12771.1			386.219	171
0	1	610	CIAP	Hoshizaki (1974)	Groundbased Cameras	B-52	19720000													56.4	100	7	0.28	230		610										600	620	205			12771.1			386.219	171
2	0	3	CSAE	Baumgardner and Cotton (1994)	NCAR Sabreliner	LJ35	19890323				Colorado	FSSP-300_0.35_20_um	0.5	20	7000 cm-3	BC94			1	12.04	6.423	0.68	0.3	189		3												221.15	215.8		10			334.951	256	242	270	1	104
2	0	3.5	CSAE	Baumgardner and Cotton (1994)	NCAR Sabreliner	LJ35	19890323				Colorado	FSSP-300_0.35_20_um	0.5	20	7000 cm-3	BC94			1	12.04	6.423	0.68	0.3	189		3.5												221.15			10			334.951	256	242	270	1	104
2	0	4	CSAE	Baumgardner and Cotton (1994)	NCAR Sabreliner	LJ35	19890323				Colorado	FSSP-300_0.35_20_um	0.5	20	7000 cm-3	BC94			1	12.04	6.423	0.68	0.3	189		4												221.15			10			334.951	256	242	270	1	104
2	0	6	CSAE	Baumgardner and Cotton (1994)	NCAR Sabreliner	LJ35	19890323				Colorado	FSSP-300_0.35_20_um	0.5	20	7000 cm-3	BC94			1	12.04	6.423	0.68	0.3	189		6												221.15			10			334.951	256	242	270	1	104
3	0	480	ICE	Quante (2006), Albers et al. (1990)	Falcon	AIRLINER	19890924			13:00:00	Northsea, 50 km SSW of Helgoland	FSSP-100 and PMS 2-DC	2	200		ICE206						1.38889		195.652		360										300	480	223			9.7			320	277			1	93
3	0	600	ICE	Gayet etal. (1996)	MerlinIV	AIRLINERS	19891013			11:25:00	Northsea_UA7	FSSP-100+2DC	3	800		ICE210										600										400	700	242.15						240	394			1
3	0	600	ICE	Gayet etal. (1996)	MerlinIV	AIRLINERS	19891013			12:09:00	Northsea_UA7	FSSP-100+2DC	3	800		ICE210										600										400	700	242.15						240	394			1
3	0	600	ICE	Gayet etal. (1996)	MerlinIV	AIRLINERS	19891013			12:41:00	Northsea_UA7	FSSP-100+2DC	3	800		ICE210										600										400	700	238.15						255	361			1
3	0	600	ICE	Gayet etal. (1996)	MerlinIV	AIRLINERS	19891013			12:57:00	Northsea_UA7	FSSP-100+2DC	3	800		ICE210										600										400	700	240.15						260	372			1
0	2	3600	ICE	Kästner et al (1993)	DO-228	AIRLINER	19891018			12:21:00	German Bay,7.3E,53.6N	Lidar, ALEX-F on DO 228+NOAA-11-AHHRR				ICE216										3600										2400	5400	230.15			9	8.8	9.1	300	314			1	80
0	2	3600	ICE	Kästner et al (1993)	DO-228	AIRLINER	19891018			12:23:00	German Bay,7.3E,53.6N	Lidar, ALEX-F on DO 228+NOAA-11-AHHRR				ICE216										3600										2400	5400	222.15			10.1	10	10.2	335	270			1	80
0	2	3600	ICE	Kästner et al (1993)	DO-238	AIRLINER	19891018			12:26:00	German Bay,7.3E,53.6N	Lidar, ALEX-F on DO 228+NOAA-11-AHHRR				ICE216										3600										2400	5400	232.15			8.4	8.1	8.5	270	347			1	90
0	2	3600	ICE	Ruppersberg and Renger (1991); Schumann and Wendling (1990)	DO228	AIRLINER	19891018			13:14:00	German Bay, 6.8E, 53.4N	Lidar, ALEX-F on Do228				ICE216										3600										2400	5400	236.15			8.2	7.6	8.3	270	361			1	90
0	2	3600	ICE	Betancor-Gothe and Graßl (1993)	NOAA-11 AVHRR	AIRLINER	19891018			12:23:00	German Bay (52-556°N, 5-11°E)	NOAA-11-AVHRR				ICE216										3600										2000	7200	222.15	220.15	224.15	10.5	9.5	11		260			1	100
0	4	19.6	SiL	Baumann et al.(1993), see also Schumann (1994, 1996), Busen et al. (1994)	Falcon_Lidar ALEX	B742	19910409	44760		12:25:00	Germany:49.2N_11.7E									59.64	255.8	12.46	0.33	225	310	19.6												210.15						350.373	238				21
0	4	21.3	SiL	Baumann et al.(1993), see also Schumann (1994, 1996), Busen et al. (1994)	Falcon_Lidar ALEX	B742	19910409	44760			Germany:49.2N_11.7E									59.64	255.8	12.46	0.33	225	310	21.3												210.15						350.373	238				21
0	4	23.1	SiL	Baumann et al.(1993), see also Schumann (1994, 1996), Busen et al. (1994)	Falcon_Lidar ALEX	B742	19910409	44760			Germany:49.2N_11.7E									59.64	255.8	12.46	0.33	225	310	23.1												210.15						350.373	238				21
0	4	25.3	SiL	Baumann et al.(1993), see also Schumann (1994, 1996), Busen et al. (1994)	Falcon_Lidar ALEX	B742	19910409	44760			Germany:49.2N_11.7E									59.64	255.8	12.46	0.33	225	310	25.3												210.15						350.373	238				21
0	4	31.1	SiL	Baumann et al.(1993), see also Schumann (1994, 1996), Busen et al. (1994)	Falcon_Lidar ALEX	B742	19910409	44760			Germany:49.2N_11.7E									59.64	255.8	12.46	0.33	225	310	31.1												210.15						350.373	238				21
0	4	32	SiL	Baumann et al.(1993), see also Schumann (1994, 1996), Busen et al. (1994)	Falcon_Lidar ALEX	B742	19910409	44760			Germany:49.2N_11.7E									59.64	255.8	12.46	0.33	225	310	32												210.15						350.373	238				21
0	4	48.8889	SiL	Baumann et al.(1993), see also Schumann (1994, 1996), Busen et al. (1994)	Falcon_Lidar ALEX	B742	19910409	44760			Germany:49.2N_11.7E									59.64	255.8	12.46	0.33	225	310	48.8889												210.15						350.373	238				21
4	0	694	FIRE	Poellot et al. (1999)	C550	C550	19911122									A	Pratt & Whitney Canada JT15D	2	Y	15.9	4.5	0.6	0.3	207.922		694												219.55						339.991	250
4	0	233	FIRE	Poellot et al. (1999)	C550	C550	19911125									B			Y	15.9	4.5	0.6	0.3	210.042		233												224.05						306.573	292
4	0	2640	FIRE	Poellot et al. (1999)	C550	C550	19911126									D			Y	15.9	4.5	0.6	0.3	208.961		2640												221.75						309.581	288
4	0	732	FIRE	Poellot et al. (1999)	C550	C550	19911126									G1			Y	15.9	4.5	0.6	0.3	205.157		732												213.75						339.991	250
4	0	907	FIRE	Poellot et al. (1999)	C550	C550	19911126									G2			Y	15.9	4.5	0.6	0.3	205.397		907												214.25						339.145	251
4	0	187	FIRE	Poellot et al. (1999)	C550	C550	19911126									J1			Y	15.9	4.5	0.6	0.3	204.917		187												213.25						339.145	251
4	0	254	FIRE	Poellot et al. (1999)	C550	C550	19911126									J2			Y	15.9	4.5	0.6	0.3	205.397		254												214.25						339.145	251
4	0	310	FIRE	Poellot et al. (1999)	C550	C550	19911128									N			Y	15.9	4.5	0.6	0.3	208.253		310												220.25						350.373	238
4	0	179	FIRE	Poellot et al. (1999)	C550	C550	19911130									O			Y	15.9	4.5	0.6	0.3	207.637		179												218.95							217
4	0	178	FIRE	Poellot et al. (1999)	C550	C550	19911130									P			Y	15.9	4.5	0.6	0.3	207.543		178												218.75							217
5	0	1800	CIRRUS'92	Strauss et al. (1997)	Falcon	AIRLINERS	19921009				Southern Germany	Replicator	1	100		contrail			0							1800										1200	2400	232	228	236	9000	8500	9500	300.655	300	285	330	1	90
5	0		CIRRUS'92	Strauss et al. (1997), details in Strauss (1994)	Falcon	AIRLINERS	19921015	36000		09:46-10:28	48.3°N,10.3°E S.-Germany	Replicator	1	100		cirrus			0							0												217	216	218	10500	10350	10665	345.997	243	239	250	1
0	4	3600	SiL	Freudenthaler et al. (1994)	Ground	unknown	19930401	57600		16:00:00	47.5N,11E, Garmisch; DE	Lidar				Ann_Geophys_paper										3600										3000	4200	212.15	211	213	10.5	10.3	10.6	340	250			1	60
5	0	120	CIRRUS'94	Wendling et al. (1997)	Falcon	Airliners	19940321	54180		15:03:00	Southern Germany	Replicator	1	100		Contrail			0							120										100	180	213.15	212.15	214.15				348.614	240			1	100
4	0	244	ARM	Poellot et al. (1999)	C500	C500	19940418									S			Y	15.9	6	0.6	0.3	202.306		244												207.85							180
4	0	206	ARM	Poellot et al. (1999)	C500	C500	19940418									T			Y	15.9	6	0.6	0.3	202.354		206												207.95							180
4	0	300	ARM	Arnott in Sassen (1997)	C500	C500	19940418			01:15:48	34.94°N,98.23°W	Replicator	2	50					Y	15.9	6	0.6	0.3	202.014		300										270	330	207.25			12.97				166			1
4	0	206	ARM	Poellot et al. (1999)	C500	C500	19940419									U			Y	15.9	6	0.6	0.3	202.062		206												207.35							179
0	3	1800	SiL, DFG	Freudenthaler et al. (1995; 1996, 1999)	ground	unknown	19940929			09:50:00	47.5N,11E, Garmisch; DE	IFU-Lidar				Sample-case										1800												229.155	228.16	230.15	9.45	9.3	9.6	308.449	289.5	282	297		70
0	3	2040	SiL, DFG	Freudenthaler et al. (1995; 1996, 1999)	ground	unknown	19940929				47.5N,11E, Garmisch; DE	IFU-Lidar				0102e3										2040												229.155	228.16	230.15	9.45	9.3	9.6	308.449	289.5	282	297		70
0	3	135	SiL, DFG	Freudenthaler et al. (1995; 1996, 1999)	ground	unknown	19940930			10:12:15	47.5N,11E, Garmisch; DE	IFU-Lidar				0103e3										135												224.155	223.16	225.15	10.41	10.29	10.53	330.824	261	257	265		65
0	3	342	SiL, DFG	Freudenthaler et al. (1995; 1996, 1999)	ground	unknown	19940930				47.5N,11E, Garmisch; DE	IFU-Lidar				0121										342												224.155	223.16	225.15	10.44	10.31	10.57	330.824	261	257	265		65
0	3	618	SiL, DFG	Freudenthaler et al. (1995; 1996, 1999)	ground	unknown	19940930				47.5N,11E, Garmisch; DE	IFU-Lidar				0122										618												223.655	222.16	225.15	10.5	10.35	10.65	332.88	258.5	252	265		65
0	3	888	SiL, DFG	Freudenthaler et al. (1995; 1996, 1999)	ground	unknown	19940930				47.5N,11E, Garmisch; DE	IFU-Lidar				0124										888												223.155	222.16	224.15	10.52	10.37	10.67	332.88	258.5	252	265		65
0	3	300	SiL, DFG	Freudenthaler et al. (1995; 1996, 1999)	ground	unknown	19940930			10:30:00	47.5N,11E, Garmisch; DE	IFU-Lidar				0127										300												217.655	216.16	219.15	11.075	10.9	11.25	360.727	226.5	220	233		75
0	3	600	SiL, DFG	Freudenthaler et al. (1995; 1996, 1999)	ground	unknown	19940930				47.5N,11E, Garmisch; DE	IFU-Lidar				0128e										600												217.655	216.16	219.15	11.1	10.95	11.25	363.034	224	220	228		75
0	3	840	SiL, DFG	Freudenthaler et al. (1995; 1996, 1999)	ground	unknown	19940930				47.5N,11E, Garmisch; DE	IFU-Lidar				0130e										840												217.655	216.16	219.15	11.125	10.95	11.3	363.963	223	218	228		75
0	3	816	SiL, DFG	Freudenthaler et al. (1995; 1996, 1999)	ground	unknown	19940930				47.5N,11E, Garmisch; DE	IFU-Lidar				0132e										816												218.155	216.16	220.15	11.05	10.8	11.3	359.81	227.5	218	237		75
0	3	990	SiL, DFG	Freudenthaler et al. (1995; 1996, 1999)	ground	unknown	19940930				47.5N,11E, Garmisch; DE	IFU-Lidar				0133e										990												218.155	216.16	220.15	11.05	10.8	11.3	359.81	227.5	218	237		75
0	3	1380	SiL, DFG	Freudenthaler et al. (1995; 1996, 1999)	ground	unknown	19940930				47.5N,11E, Garmisch; DE	IFU-Lidar				0134e										1380												218.155	216.16	220.15	11.05	10.8	11.3	359.81	227.5	218	237		75
0	3	1740	SiL, DFG	Freudenthaler et al. (1995; 1996, 1999)	ground	unknown	19940930				47.5N,11E, Garmisch; DE	IFU-Lidar				0137e										1740												218.155	216.16	220.15	11.05	10.8	11.3	359.81	227.5	218	237		75
0	3	1500	SiL, DFG	Freudenthaler et al. (1995; 1996, 1999)	ground	unknown	19940930			11:13:00	47.5N,11E, Garmisch; DE	IFU-Lidar				0189e										1500												218.655	216.16	221.15	11	10.7	11.3	358.441	229	218	240		75
0	3	1860	SiL, DFG	Freudenthaler et al. (1995; 1996, 1999)	ground	unknown	19940930				47.5N,11E, Garmisch; DE	IFU-Lidar				0141e										1860												218.655	216.16	221.15	11	10.7	11.3	358.441	229	218	240		75
0	3	67.8	SiL, DFG	Freudenthaler et al. (1995; 1996, 1999)	ground	unknown	19941011			11:37:10	47.5N,11E, Garmisch; DE	IFU-Lidar				0139e										67.8												223.155	222.16	224.15	10.285	10.15	10.42	342.977	246.5	238	255		87.5
0	3	372	SiL, DFG	Freudenthaler et al. (1995; 1996, 1999)	ground	unknown	19941011				47.5N,11E, Garmisch; DE	IFU-Lidar				193										372												222.655	221.16	224.15	10.35	10.2	10.5	340.416	249.5	244	255		87.5
0	3	654	SiL, DFG	Freudenthaler et al. (1995; 1996, 1999)	ground	unknown	19941011				47.5N,11E, Garmisch; DE	IFU-Lidar				195										654												222.155	220.16	224.15	10.35	10.2	10.5	340.416	249.5	244	255		87.5
0	3	930	SiL, DFG	Freudenthaler et al. (1995; 1996, 1999)	ground	unknown	19941011				47.5N,11E, Garmisch; DE	IFU-Lidar				197										930												221.655	219.16	224.15	10.425	10.2	10.65	342.548	247	239	255		87.5
0	3	510	SiL, DFG	Freudenthaler et al. (1995; 1996, 1999)	ground	unknown	19941011			09:33:35	47.5N,11E, Garmisch; DE	IFU-Lidar				0319e2										510												215.155	212.16	218.15	11.3	10.9	11.7	371.038	215.5	202	229		90
0	3	1080	SiL, DFG	Freudenthaler et al. (1995; 1996, 1999)	ground	unknown	19941011				47.5N,11E, Garmisch; DE	IFU-Lidar				0172e										1080												215.655	212.16	219.15	11.2	10.7	11.7	366.77	220	202	238		90
0	3	1380	SiL, DFG	Freudenthaler et al. (1995; 1996, 1999)	ground	unknown	19941011				47.5N,11E, Garmisch; DE	IFU-Lidar				0175e										1380												215.655	212.16	219.15	11.2	10.7	11.7	366.77	220	202	238		90
0	3	1770	SiL, DFG	Freudenthaler et al. (1995; 1996, 1999)	ground	unknown	19941011				47.5N,11E, Garmisch; DE	IFU-Lidar				0176e										1770												216.155	212.16	220.15	11.1	10.5	11.7	363.963	223	202	244		90
0	3	2250	SiL, DFG	Freudenthaler et al. (1995; 1996, 1999)	ground	unknown	19941011				47.5N,11E, Garmisch; DE	IFU-Lidar				0177e										2250												216.155	213.16	219.15	11.15	10.7	11.6	365.363	221.5	205	238		90
0	3	120	SiL, DFG	Freudenthaler et al. (1995; 1996, 1999)	ground	unknown	19941011			11:19:00	47.5N,11E, Garmisch; DE	IFU-Lidar				0178e										120												223.155	222.16	224.15	10.275	10.15	10.4	338.722	251.5	248	255		85
0	3	1980	SiL, DFG	Freudenthaler et al. (1995; 1996, 1999)	ground	unknown	19941011			10:11:20	47.5N,11E, Garmisch; DE	IFU-Lidar				0143e										1980												216.155	214.16	218.15	11.095	10.88	11.31	364.895	222	215	229		90
0	3	2190	SiL, DFG	Freudenthaler et al. (1995; 1996, 1999)	ground	unknown	19941011				47.5N,11E, Garmisch; DE	IFU-Lidar				0179e										2190												216.155	214.16	218.15	11.125	10.9	11.35	365.363	221.5	214	229		90
0	3	2490	SiL, DFG	Freudenthaler et al. (1995; 1996, 1999)	ground	unknown	19941011				47.5N,11E, Garmisch; DE	IFU-Lidar				0180e										2490												216.155	214.16	218.15	11.15	10.9	11.4	366.3	220.5	212	229		90
0	3	2706	SiL, DFG	Freudenthaler et al. (1995; 1996, 1999)	ground	unknown	19941011				47.5N,11E, Garmisch; DE	IFU-Lidar				0181e										2706												216.155	214.16	218.15	11.19	10.97	11.41	370.083	216.5	212	221		90
0	3	3600	SiL, DFG	Freudenthaler et al. (1995; 1996, 1999)	ground	unknown	19941027			13:55:00	47.5N,11E, Garmisch; DE	IFU-Lidar				288										3600												217.655	216.16	219.15	10.25	10	10.5	343.406	246	237	255		62.5
0	3	168	SiL, DFG	Freudenthaler et al. (1995; 1996, 1999)	ground	unknown	19941109			11:24:04	47.5N,11E, Garmisch; DE	IFU-Lidar				199										168												221.655	221.16	222.15	9.8	9.7	9.9	325.553	267.5	263	272		47.5
0	3	378	SiL, DFG	Freudenthaler et al. (1995; 1996, 1999)	ground	unknown	19941109				47.5N,11E, Garmisch; DE	IFU-Lidar				286										378												221.655	221.16	222.15	9.8	9.7	9.9	325.553	267.5	263	272		47.5
0	3	684	SiL, DFG	Freudenthaler et al. (1995; 1996, 1999)	ground	unknown	19941109				47.5N,11E, Garmisch; DE	IFU-Lidar				287										684												221.655	221.16	222.15	9.8	9.7	9.9	325.553	267.5	263	272		47.5
0	3	120	SiL, DFG	Freudenthaler et al. (1995; 1996, 1999)	ground	unknown	19941109			14:06:00	47.5N,11E, Garmisch; DE	IFU-Lidar				256										120												220.655	220.16	221.15	9.885	9.81	9.96	328.784	263.5	260	267		47.5
0	3	390	SiL, DFG	Freudenthaler et al. (1995; 1996, 1999)	ground	unknown	19941109				47.5N,11E, Garmisch; DE	IFU-Lidar				0291										390												220.655	220.16	221.15	9.93	9.86	10	330.006	262	259	265		47.5
0	3	720	SiL, DFG	Freudenthaler et al. (1995; 1996, 1999)	ground	unknown	19941109				47.5N,11E, Garmisch; DE	IFU-Lidar				0293										720												220.655	220.16	221.15	9.955	9.86	10.05	330.824	261	257	265		47.5
0	3	1140	SiL, DFG	Freudenthaler et al. (1995; 1996, 1999)	ground	unknown	19941124			14:40:00	47.5N,11E, Garmisch; DE	IFU-Lidar				0295										1140												222.655	220.16	225.15	9.61	9.41	9.81	316.088	279.5	272	287		85
6	0	0.3	SULFUR-1	Busen and Schumann (1995)	leased propeller aircraft	ATTAS	19941213	37200		10:20:00	Northern Germany, 54N,9.5E	airborre camera, Radiosonde				threshold	M45H Mk501 turbofan	2	1	21.5	19	2.18261	0.14	115		0.3										0.217391	0.304348	223.45	222.95	223.95				299	302.3	301.6	303	0	80
6	0	19	SULFUR-2	Schumann et al. (1996)	Falcon	ATTAS	19950322	38447		10:40:47	S. Germany, 12E, 49 N	FSSP-100	1	100		LH_path1	M45H Mk501 turbofan	2	1	21.5	18.65	1.00613	0.168	163		19										18	20	218.15	217.65	218.65				310	287	285	289	0	70
0	3	48	SiL, DFG	Freudenthaler et al. (1995; 1996, 1999)	ground	unknown	19950515			11:11:15	47.5N,11E, Garmisch; DE	IFU-Lidar				0182e										48															10.685	10.66	10.71	350.558	237.79	236.86	238.72
0	3	37.8	SiL, DFG	Freudenthaler et al. (1995; 1996, 1999)	ground	unknown	19951002			10:55:00	47.5N,11E, Garmisch; DE	IFU-Lidar				0430										37.8												215.655	214.16	217.15	11.515	11.46	11.57	384.796	201.5	197	206		80
0	3	336	SiL, DFG	Freudenthaler et al. (1995; 1996, 1999)	ground	unknown	19951002			13:13:35	47.5N,11E, Garmisch; DE	IFU-Lidar				KS4ABC 0534A										336												215.655	214.16	217.15	11.51	11.42	11.6	384.796	201.5	197	206		80
0	3	552	SiL, DFG	Freudenthaler et al. (1995; 1996, 1999)	ground	unknown	19951002				47.5N,11E, Garmisch; DE	IFU-Lidar				KS22A, 0542										552												215.655	214.16	217.15	11.525	11.44	11.61	384.796	201.5	197	206		80
0	3	978	SiL, DFG	Freudenthaler et al. (1995; 1996, 1999)	ground	unknown	19951002				47.5N,11E, Garmisch; DE	IFU-Lidar				KS22B, 0543										978												215.655	214.16	217.15	11.635	11.53	11.74	384.796	201.5	197	206		80
0	3	1188	SiL, DFG	Freudenthaler et al. (1995; 1996, 1999)	ground	unknown	19951002				47.5N,11E, Garmisch; DE	IFU-Lidar				KS22D, 0546										1188												215.655	214.16	217.15	11.645	11.55	11.74	384.796	201.5	197	206		80
0	3	1428	SiL, DFG	Freudenthaler et al. (1995; 1996, 1999)	ground	unknown	19951002				47.5N,11E, Garmisch; DE	IFU-Lidar				KS22E, 0547										1428												215.655	214.16	217.15	11.615	11.51	11.72	384.796	201.5	197	206		80
0	3	6	SiL, DFG	Freudenthaler et al. (1995; 1996, 1999)	ground	unknown	19951026			10:24:34	47.5N,11E, Garmisch; DE	IFU-Lidar				KS22F, 0549										6												210.155	210.16	210.15	12.125	12.08	12.17	388.869	197.5	195	200		65
0	3	13.8	SiL, DFG	Freudenthaler et al. (1995; 1996, 1999)	ground	unknown	19951026				47.5N,11E, Garmisch; DE	IFU-Lidar				KS7, 0623-1A										13.8												210.155	210.16	210.15	12.125	12.08	12.17	388.869	197.5	195	200		65
0	3	22.2	SiL, DFG	Freudenthaler et al. (1995; 1996, 1999)	ground	unknown	19951026				47.5N,11E, Garmisch; DE	IFU-Lidar				KS7, 0623-1B										22.2												210.155	210.16	210.15	12.125	12.08	12.17	388.869	197.5	195	200		65
0	3	105	SiL, DFG	Freudenthaler et al. (1995; 1996, 1999)	ground	unknown	19951026				47.5N,11E, Garmisch; DE	IFU-Lidar				KS7, 0623-1C										105												210.155	210.16	210.15	12.0775	11.985	12.17	390.413	196	195	197		65
0	3	945	SiL, DFG	Freudenthaler et al. (1995; 1996, 1999)	ground	unknown	19951026			10:57:31	47.5N,11E, Garmisch; DE	IFU-Lidar				KS7, 0623-2										945												210.155	210.16	210.15	12.065	11.88	12.25	390.413	196	195	197		65
0	3	19.8	SiL, DFG	Freudenthaler et al. (1995; 1996, 1999)	ground	unknown	19951109			ca. 12:30	47.5N,11E, Garmisch; DE	IFU-Lidar				KS8, 0625										19.8												220.655	220.16	221.15	10.055	9.99	10.12	329.598	262.5	260	265		90
0	3	72	SiL, DFG	Freudenthaler et al. (1995; 1996, 1999)	ground	unknown	19951109				47.5N,11E, Garmisch; DE	IFU-Lidar				KS6A, 0661-1										72												221.155	220.16	222.15	10.005	9.88	10.13	328.378	264	260	268		90
0	3	27	SiL, DFG	Freudenthaler et al. (1995; 1996, 1999)	ground	unknown	19951109			ca. 12:30	47.5N,11E, Garmisch; DE	IFU-Lidar				KS6B, 0661-2										27												215.155	215.16	215.15	10.72	10.68	10.76	348.614	240	240	240		80
0	3	25.2	SiL, DFG	Freudenthaler et al. (1995; 1996, 1999)	ground	unknown	19951110			ca. 10:00	47.5N,11E, Garmisch; DE	IFU-Lidar				0663										25.2												222.155	222.16	222.15	9.465	9.44	9.49	308.073	290	290	290		90
0	3	76.8	SiL, DFG	Freudenthaler et al. (1995; 1996, 1999)	ground	unknown	19951110				47.5N,11E, Garmisch; DE	IFU-Lidar				KS2A,B 0669-1										76.8												222.655	222.16	223.15	9.425	9.35	9.5	308.073	290	290	290		90
0	3	28.8	SiL, DFG	Freudenthaler et al. (1995; 1996, 1999)	ground	unknown	19951113			ca. 13:40	47.5N,11E, Garmisch; DE	IFU-Lidar				KS2* 0669-2										28.8												219.155	219.16	219.15	10.055	10.03	10.08	329.884	262.15	261.14	263.15		65
0	3	61.8	SiL, DFG	Freudenthaler et al. (1995; 1996, 1999)	ground	unknown	19951113				47.5N,11E, Garmisch; DE	IFU-Lidar				0677-1										61.8												219.655	219.16	220.15	9.97	9.94	10	327.099	265.58	264.36	266.8		65
0	3	25.8	SiL, DFG	Freudenthaler et al. (1995; 1996, 1999)	ground	unknown	19951113			14:01:51	47.5N,11E, Garmisch; DE	IFU-Lidar				0677-2										25.8												212.155	212.16	212.15	11.3	11.28	11.32	370.694	215.86	215.18	216.54		60
0	3	48	SiL, DFG	Freudenthaler et al. (1995; 1996, 1999)	ground	unknown	19951113				47.5N,11E, Garmisch; DE	IFU-Lidar				KS3A,B 0680-1										48												212.155	212.16	212.15	11.275	11.22	11.33	369.874	216.72	214.84	218.6		60
0	3	19.8	SiL, DFG	Freudenthaler et al. (1995; 1996, 1999)	ground	unknown	19951113			14:15:00	47.5N,11E, Garmisch; DE	IFU-Lidar				KS3* 0680-2										19.8												214.155	214.16	214.15	10.71	10.68	10.74	351.372	236.87	235.75	237.98		65
0	3	49.8	SiL, DFG	Freudenthaler et al. (1995; 1996, 1999)	ground	unknown	19951113				47.5N,11E, Garmisch; DE	IFU-Lidar				KS9 0681-1										49.8												214.155	214.16	214.15	10.69	10.64	10.74	350.717	237.61	235.75	239.47		65
0	3	73.2	SiL, DFG	Freudenthaler et al. (1995; 1996, 1999)	ground	unknown	19951113				47.5N,11E, Garmisch; DE	IFU-Lidar				KS9 0681-2										73.2												215.155	215.16	215.15	10.62	10.61	10.63	348.421	240.22	239.84	240.59		65
6	0	2	SULFUR-4	Petzold et al. (1997)	Falcon	A310	19960313				Southern Germany	FSSP300,0.3-20 um	0.3	20		young	CF6-80C2A2	2	1	43.9	120	4.4	0.28	180		2										1.5	3	215						350	238.4				25
6	0	5	SULFUR-4	Schröder et al. (2000)	Falcon	A310	19960313				Southern Germany	FSSP300,0.4-20 um				SchrA			1	43.9	120	4.4	0.28	180		5												215.15						350	238.4			0	30
6	0	2	SULFUR-4	Petzold et al. (1997)	Falcon	ATTAS	19960315			12.8	Southern Germany	FSSP300,0.3-20 um	0.3	20		plume center	M45H Mk50	2	1	21.5	17.65	2	0.17	165		2										1.5	3	221						310	287.4				55
6	0	2	SULFUR-4	Petzold et al. (1997)	Falcon	ATTAS	19960315			12.8	Southern Germany	FSSP300,0.3-20 um	0.3	20		plume center	M45H Mk51	2	1	21.5	17.65	2	0.17	165		2										1.5	3	221						310	287.4				55
6	0	2	SULFUR-4	Petzold et al. (1997)	Falcon	ATTAS	19960315			12.8	Southern Germany	FSSP300,0.3-20 um	0.3	20		plume edge	M45H Mk52	2	1	21.5	17.65	2	0.17	165		2										1.5	3	221						310	287.4				55
6	0	2	SULFUR-4	Petzold et al. (1997)	Falcon	ATTAS	19960315			12.8	Southern Germany	FSSP300,0.3-20 um	0.3	20		plume edge	M45H Mk53	2	1	21.5	17.65	2	0.17	165		2										1.5	3	221						310	287.4				55
6	0	10	SULFUR-4	Petzold et al. (1997)	Falcon	ATTAS	19960315			13	Southern Germany	FSSP300,0.3-20 um	0.3	20		aged	M45H Mk54	2	1	21.5	17.65	2	0.17	165		10										8	12	221						310	287.4				55
6	0	10	SULFUR-4	Petzold et al. (1997)	Falcon	ATTAS	19960315			13	Southern Germany	FSSP300,0.3-20 um	0.3	20		aged	M45H Mk55	2	1	21.5	17.65	2	0.17	165		10										8	12	221						310	287.4				55
0	5	900	SUCCESS	Spinhirn et al. (1998), Duda et al. (1998), estim._age, young	ER-2	unkown	19960420	57360		1556	NE_Oklahoma	ER2-Lidar+IR spectrometer				Spinhirn et al. (1998), Duda et al. (1998), estim._age						4.641				900										360	1200	228.15	227.65	230.15	9.2	8.5	9.5	299.195	302	299	305	1
0	5	3900	SUCCESS	Spinhirn et al. (1998), Duda et al. (1998), estim._age, aged	ER-2	unkown	19960420	59640		1643	NE_Oklahoma	ER2-Lidar+IR spectrometer				Spinhirn et al. (1998), Duda et al. (1998), estim._age						4.641				3900										2580	4500	233.15	232.15	233.35	8.5	7.7	9.2	276.175	335	332	338	1
0	3	36	AEROCONTRAIL	Sussmann et al. (1999)	Ground	B744	19960422	45420		12:37:00	48.3N,10.7E, Margertshausen near Augsburg; DE	IFU-Lidar								64.44	344.869	11.7	0.33	247.5		36										5.7	50.3	220.85			10170			328.622	263.7
0	3	30	AEROCONTRAIL	Freudenthaler pers comm (2016)	ground	unknown	19960422			12:36:37	48.3N,10.7E, Margertshausen	IFU-Lidar				KS9 0681-3										30												220.155	220.16	220.15	10.1	10.05	10.15	331.357	260.35	258.35	262.34		55
0	3	60	AEROCONTRAIL	Freudenthaler pers comm (2016)	ground	unknown	19960422				48.3N,10.7E, Margertshausen	IFU-Lidar				KS10 0719 W										60												219.655	219.16	220.15	10.13	10.08	10.18	332.343	259.15	257.16	261.14		55
0	3	168	AEROCONTRAIL	Sussmann and Gierens (1999)	Ground		19960423			12:40:00	48.3N,10.7E, Margertshausen near Augsburg; DE	IFU-Lidar+ Model								64.44	344.869		0.33	247.5		168										165	173	220.85			10170			328.622	263.7				101
0	3	60	AEROCONTRAIL	Freudenthaler pers comm (2016)	ground	unknown	19960423				48.3N,10.7E, Margertshausen	IFU-Lidar				KS10 0719 F										60															10.03	10	10.06	329.069	263.15	261.94	264.36		55
0	3	240	AEROCONTRAIL	Freudenthaler pers comm (2016)	ground	unknown	19960423				48.3N,10.7E, Margertshausen	IFU-Lidar				0723										240												211.155	210.16	212.15	11.3	11.2	11.4	370.665	215.89	212.49	219.29		65
0	3	510	AEROCONTRAIL	Freudenthaler pers comm (2016)	ground	unknown	19960423				48.3N,10.7E, Margertshausen	IFU-Lidar				0732										510												210.155	209.16	211.15	11.375	11.25	11.5	373.084	213.37	209.16	217.57		65
0	3	840	AEROCONTRAIL	Freudenthaler pers comm (2016)	ground	unknown	19960423				48.3N,10.7E, Margertshausen	IFU-Lidar				0733										840												209.655	207.16	212.15	11.5	11.2	11.8	376.941	209.4	199.5	219.29		65
0	3	60	AEROCONTRAIL	Freudenthaler pers comm (2016)	ground	unknown	19960423				48.3N,10.7E, Margertshausen	IFU-Lidar				0735										60												210.655	210.16	211.15	11.33	11.26	11.4	371.651	214.86	212.49	217.23		65
0	3	222	AEROCONTRAIL	Freudenthaler pers comm (2016)	ground	unknown	19960423				48.3N,10.7E, Margertshausen	IFU-Lidar				0736										222												211.155	210.16	212.15	11.295	11.16	11.43	370.484	216.08	211.48	220.68		65
6	0	350	CONTRAIL	Schröder et al. (2000)	Falcon	A330	19960425				Southern Germany	FSSP300,0.4-20 um				SchrE			0	60.3	190	6.5	0.33	230		350										300	400	218.15						330.006	262			1	70
6	0	700	CONTRAIL	Schröder et al. (2000)	Falcon	Falcon	19960425				Southern Germany	FSSP300,0.4-20 um				SchrF			1	16.3	10	0.57	0.33	180		700												218.15						330.006	262			1	70
6	0	135	SULFUR-5	Schröder et al. (2000)	Falcon	DC9	19960502	28824		08:24:00	Southern Germany	FSSP300,0.4-20 um+Replicator				SchrD=C2			1	28.4	46	2.5	0.33	230		135										135	180	220.15						310.338	287			1	80
6	0	800	CONTRAIL	Schröder et al. (2000)	Falcon	A330	19960502				Southern Germany	FSSP300,0.4-20 um				SchrO			0	60.3	190	6.5	0.33	230		800												219.15						320.384	274			1	80
0	5		SUCCESS	Jensen et al. (1998)	DC-8	B757	19960504	65520	65640	18:12:00																0
7	0	30	SUCCESS	Baumgardner and Gandrud (1998)	DC-8	B757	19960504	68030	68090	18:54:00		MASP	0.3	20		BG98			1	38.05	95	4.3	0.33	236		30										25	35	210							197				112
7	0	2000	SUCCESS	Heymsfield et al. (1998), Jensen et al. (1998)	DC-8	DC8	19960512	82500	85100		about 38.5N, 124.5W, Pacific Ocean, off the Northern California Coast	MASP, 0.4-40um				DC8			1	45.2	100	4.64	0.33	232		2000										1300	2600	221						349.492	239			1	140
0	5	14400	SUCCESS	Minnis/Jensen(1998)	Satellite	DC8	19960512	86400			California coast	GOES-8 + NOOA12				DC8			1	45.2	100	4.64	0.33	232		14400										3600	25200
6	0	120	SULFUR-5	Schröder et al. (2000)	Falcon	B737	19961009				Southern Germany	FSSP300,0.4-20 um				SchrB1			1	34.3	60	2.82	0.33	230		120												216.15						350.373	238				80
6	0	600	CONTRAIL	Schröder et al. (2000)	Falcon	B737	19961009				Southern Germany	FSSP300,0.4-20 um				SchrB2			1	34.3	60	2.82	0.33	230		600												216.15						350.373	238				50
6	0	30	SULFUR-5	Schröder et al. (2000)	Falcon	B757	19961010				Southern Germany	FSSP300,0.4-20 um				SchrB			1	38.05	95.2	4.31	0.33	240		30												219.15						330.006	262				50
6	0	70	SULFUR-5	Schröder et al. (2000), Gayet et al. (1998)	Falcon	A310	19961010				Southern Germany	FSSP300,0.4-20 um				SchrA1			1	43.9	120	5.06	0.33	230		70												219.15						330.006	262				50
6	0	200	CONTRAIL	Schröder et al. (2000)	Falcon	A300	19961010				Southern Germany	FSSP300,0.4-20 um				SchrA2			1	44.84	140	6.22	0.33	230		200										180	300	219.15						330.006	262				50
6	0	2000	AEROCONTRAIL	Schröder et al. (2000), Gayet et al. (1998)	Falcon	B737	19961014	35400		09:50:00	Southern Germany	FSSP300,0.4-20 um+Replicator				SchrU=C3			0	34.3	60	2.82	0.33	230		2000										1500		217.15	216.15					350.02	238.4		240	1	100
6	0	8	AEROCONTRAIL	Schröder et al. (2000)	Falcon	ATTAS	19970418				Southern Germany	FSSP300,0.4-20 um				SchrAT			1	21.5	17.65	2	0.17	177		8												219.15						310.035	287.4			1	60
0	6	7200	Spiral	Schumann (2002), Käster (2003)	NOAA AVHRR	B707	19980522			14:45:00	North Sea, 7.E,56.5N	NOAA AVHRR					CFM 56	4	1	44.1	100	7	0.25	195		7200										6120	10800	226.15	224	227				290	300			1
0	7	8100	Cluster	Duda et al. (2004)	GOES-8	airliners	20001009	57600		16:00:00	Great Lakes (Eastern Wisconsin)															8100																			220	200	240	y
0	7	13500	Cluster	Duda et al. (2004)	GOES-9	airliners	20001009	57600		17:00:00	Great Lakes (Eastern Wisconsin)															13500																			220	200	240	y
0	8	3600	Shutdown 1	Minnis et al. (2002)	satellites		20010912			10:15:00	15	36900				A										3600										1800	7200	223.15	220.15	226.15					225	200	250
0	8	6840	Shutdown 1	Minnis et al. (2002)	satellites		20010912			11:09:00	9	40140				A										6840										5040	10440	223.15	220.15	226.15					225	200	250
0	8	11880	Shutdown 1	Minnis et al. (2002)	satellites		20010912			12:33:00	33	45180				A										11880										10080	15480	223.15	220.15	226.15					225	200	250
0	8	16200	Shutdown 1	Minnis et al. (2002)	satellites		20010912			13:45:00	45	49500				A										16200										14400	19800	223.15	220.15	226.15					225	200	250
0	8	23400	Shutdown 1	Minnis et al. (2002)	satellites		20010912			15:45:00	45	56700				A										23400										21600	27000	223.15	220.15	226.15					225	200	250
0	8	41400	Shutdown 1	Minnis et al. (2002)	satellites		20010912			20:45:00	45	74700				A										41400										39600	45000	223.15	220.15	226.15					225	200	250
0	8	3600	Shutdown 1	Minnis et al. (2002)	satellites		20010912			10:15:00	15	36900				B										3600										1800	7200	223.15	220.15	226.15					225	200	250
0	8	6840	Shutdown 1	Minnis et al. (2002)	satellites		20010912			11:09:00	9	40140				B										6840										5040	10440	223.15	220.15	226.15					225	200	250
0	8	11880	Shutdown 1	Minnis et al. (2002)	satellites		20010912			12:33:00	33	45180				B.										11880										10080	15480	223.15	220.15	226.15					225	200	250
0	8	19800	Shutdown 1	Minnis et al. (2002)	satellites		20010912			14:45:00	45	53100				B										19800										18000	23400	223.15	220.15	226.15					225	200	250
0	8	3600	Shutdown 1	Minnis et al. (2002)	satellites		20010912			11:09:00	9	40140				C										3600										1800	7200	223.15	220.15	226.15					225	200	250
0	8	8640	Shutdown 1	Minnis et al. (2002)	satellites		20010912			12:33:00	33	45180				C										8640										6840	12240	223.15	220.15	226.15					225	200	250
0	8	3600	Shutdown 1	Minnis et al. (2002)	satellites		20010912			12:33:00	33	45180				D										3600										1800	7200	223.15	220.15	226.15					225	200	250
0	8	3600	Shutdown 1	Minnis et al. (2002)	satellites		20010912			12:33:00	33	45180				E										3600										1800	7200	223.15	220.15	226.15					225	200	250
0	8	7920	Shutdown 1	Minnis et al. (2002)	satellites		20010912			13:45:00	45	49500				E										7920										6120	11520	223.15	220.15	226.15					225	200	250
0	8	15120	Shutdown 1	Minnis et al. (2002)	satellites		20010912			15:45:00	45	56700				E										15120										13320	18720	223.15	220.15	226.15					225	200	250
0	8	3600	Shutdown 1	Minnis et al. (2002)	satellites		20010912			12:33:00	33	45180				F										3600										1800	7200	223.15	220.15	226.15					225	200	250
0	8	7920	Shutdown 1	Minnis et al. (2002)	satellites		20010912			13:45:00	45	49500				F										7920										6120	11520	223.15	220.15	226.15					225	200	250
0	8	15120	Shutdown 1	Minnis et al. (2002)	satellites		20010912			15:45:00	45	56700				F										15120										13320	18720	223.15	220.15	226.15					225	200	250
0	8	31320	Shutdown 1	Minnis et al. (2002)	satellites		20010912			20:15:00	15	72900				F										31320										29520	34920	223.15	220.15	226.15					225	200	250
0	8	3600	Shutdown 1	Minnis et al. (2002)	satellites		20010912			14:45:00	45	53100				G										3600										1800	7200	223.15	220.15	226.15					225	200	250
0	8	7200	Shutdown 1	Minnis et al. (2002)	satellites		20010912			15:45:00	45	56700				G										7200										5400	10800	223.15	220.15	226.15					225	200	250
0	8	23400	Shutdown 1	Minnis et al. (2002)	satellites		20010912			20:15:00	15	72900				G										23400										21600	27000	223.15	220.15	226.15					225	200	250
0	9	6060	Shutdown 2	Bedka,Duda;Minnis (2016)	NOAA-15	B747	20010912	660		00:11:00	CONUS	AVHRR				A		4	1	64.44	300	11.7	0.36	250	90	6060										5160	6960	217.313	215.375	219.998	12.0647	11.5647	12.5647	349.444	206.882	191.352	223.625	1	68.22
0	9	10020	Shutdown 2	Bedka,Duda;Minnis (2016)	NOAA-15	escort	20010912	660		00:11:00	CONUS	AVHRR				B									90	10020										9120	10920	215.822	214.343	218.117	12.3848	11.8848	12.8848	359.201	196.431	181.452	212.566	1	47.3
0	9	10020	Shutdown 2	Bedka,Duda;Minnis (2016)	NOAA-15	escort	20010912	660		00:11:00	CONUS	AVHRR				C									90	10020										9120	10920	215.955	214.539	218.411	12.3187	11.8187	12.8187	357.186	198.245	183.267	214.598	1	49.8
0	9	7980	Shutdown 2	Bedka,Duda;Minnis (2016)	TERRA		20010912	14400		04:00:00	CONUS	TERRA_MODIS				A									90	7980										7080	8880	215.93	214.407	218.848	12.1926	11.6926	12.6926	353.342	202.841	187.695	219.627	1	59.21
0	9	3600	Shutdown 2	Bedka,Duda;Minnis (2016)	TERRA		20010912	14400		04:00:00	CONUS	TERRA_MODIS				B									90	3600										2700	4500	216.456	214.683	219.317	12.1092	11.6092	12.6092	350.8	205.551	190.121	222.334	1	67.71
0	9	1620	Shutdown 2	Bedka,Duda;Minnis (2016)	TERRA		20010912	14400		04:00:00	CONUS	TERRA_MODIS				C									90	1620										720	2520	218.557	215.789	221.826	11.7891	11.2891	12.2891	341.044	216.979	200.358	234.314	1	100.54
0	9	10260	Shutdown 2	Bedka,Duda;Minnis (2016)	TERRA		20010912	57600		16:00:00	CONUS	TERRA_MODIS				A									90	10260										8460	12060	213.231	212.037	213.838	13.6622	13.1622	14.1622	398.136	159.785	147.511	172.965	1	11.81
0	9	17100	Shutdown 2	Bedka,Duda;Minnis (2016)	TERRA		20010912	57600		16:00:00	CONUS	TERRA_MODIS				B									90	17100										15300	18900	213.509	212.729	214.129	13.3093	12.8093	13.8093	387.379	168.958	155.788	182.915	1	17.18
0	9	6180	Shutdown 2	Bedka,Duda;Minnis (2016)	TERRA		20010912	57600		16:00:00	CONUS	TERRA_MODIS				C									90	6180										5280	7080	212.427	210.869	213.357	13.9385	13.4385	14.4385	406.557	152.739	141.185	165.767	1	9.16
0	9	2340	Shutdown 2	Bedka,Duda;Minnis (2016)	TERRA		20010912	57600		16:00:00	CONUS	TERRA_MODIS				D									90	2340										1800	2880	213.437	212.638	213.898	13.5061	13.0061	14.0061	393.378	163.559	150.806	176.755	1	13.57
0	9	1080	Shutdown 2	Bedka,Duda;Minnis (2016)	TERRA		20010912	57600		16:00:00	CONUS	TERRA_MODIS				E									90	1080										720	1440	213.616	212.891	214.235	13.4168	12.9168	13.9168	390.656	165.853	152.825	179.336	1	14.57
0	9	11586	Shutdown 2	Bedka,Duda;Minnis (2016)	NOAA-15		20010912	44880		12:28:00	CONUS	AVHRR				A									90	11586										9780	13392	215.456	214.599	217.424	12.3373	11.8373	12.8373	357.753	196.86	181.851	213.072	1	44.48
0	9	3480	Shutdown 2	Bedka,Duda;Minnis (2016)	NOAA-15		20010912	44880		12:28:00	CONUS	AVHRR				B									90	3480										2580	4380	215.187	213.913	218.227	12.0983	11.5983	12.5983	350.468	204.446	189.048	221.238	1	79.41
0	9	4260	Shutdown 2	Bedka,Duda;Minnis (2016)	NOAA-15		20010912	44880		12:28:00	CONUS	AVHRR				C									90	4260										3360	5160	214.326	213.33	215.746	12.614	12.114	13.114	366.187	189.232	174.5	204.622	1	43.7
0	9	9240	Shutdown 2	Bedka,Duda;Minnis (2016)	NOAA-14		20010912	39840		11:04:00	CONUS	AVHRR				A									90	9240										8340	10140	215.247	214.368	218.178	12.1168	11.6168	12.6168	351.032	203.255	188.056	220.105	1	61.26
8	0	870	CRYSTAL-FACE	Gao et al. (2006)	WB-57F	WB57	20020713	70640		1937	Florida;25.5°N,81°W	CAS,0.5-50	0.5	50		WB57	Pratt Whitney TF-33-11A, the commercial equivalent JT3D-3b	2	1	37.3	24.3	0.96	0.2	197		870										858	882	196.569	196.4	196.7	14.76			492	125.823	125	127	1	120
8	0	2185	CRYSTAL-FACE	Gao et al. (2006)	WB-57F	WB57	20020713	71298		1952	Florida;25.5°N,81°W	CAS,0.5-50	0.5	50		WB57	Pratt Whitney TF-33-11A, the commercial equivalent JT3D-3b	2	1	37.3	24.3	0.96	0.2	197		2185										2157	2214	195.33	195	195.7	15				119.68	118	122	1	120
8	0	780	CRYSTAL-FACE	Mullins (2006)	WB-57F	WB57	20020713	70353		1937	Florida;25.5°N,81°W	CAS,0.5-50	0.5	50		WB57	Pratt Whitney TF-33-11A, the commercial equivalent JT3D-3b	2	1	37.3	24.3	0.96	0.2	197		780										858	882	196.569	196.4	196.7	14.76				125.823	125	127	1	120
8	0	2160	CRYSTAL-FACE	Mullins (2006)	WB-57F	WB57	20020713		71520	1952	Florida;25.5°N,81°W	CAS,0.5-50	0.5	50		WB57	Pratt Whitney TF-33-11A, the commercial equivalent JT3D-3b	2	1	37.3	24.3	0.96	0.2	197		2160										2157	2214	195.33	195	195.7	15				119.68	118	122	1	120
0	10	3600	Fallstreak-1	Atlas et al. (2006)	Ground	AIRLINERS	20030907	57600			near NASA Goddard,US, 39°N, 76.9°W															3600										1000	7100	234						327.568	265				120
0	10	7100	Fallstreak-1	Atlas et al. (2006)	Ground	AIRLINERS	20030907	61200			near NASA Goddard,US, 39°N, 76.9°W															7100												234						327.568	265				120
0	10	1000	Fallstreak-1	Atlas et al. (2006)	Ground	AIRLINERS	20030907	54000			near NASA Goddard,US, 39°N, 76.9°W															1000												234						327.568	265				120
6	0	150	PAZI-2	Febvre et al. (2009)	Falcon	E170	20050914	24900			near Berlin, Germany	FSSP300,1-20 um	1			Feby			1	26	30.17	1.85	0.33	220		150												213.15							196				120
6	0	900	PAZI-2	Febvre et al. (2009)	Falcon	E170	20050914	24300	25320		near Berlin, Germany	FSSP300,1-20 um	1			Feba			1	26	30.17	1.85	0.37	220		900										660	1200	213.15							196			1	120
0	11	1140	SCOUT-O3	Schumann et al. (2016), Table 2, lower contrail	M55 Geophysica	MDB	20051116	28721	29680	07:58:41	Tiwi Islands, Australia	Camera				Photo_lower	Soloviev D-30-V12 low bypass turbofan, 93.192 kN thrust each	2	1	37.464	20	1	0.25	183		1140										1200	2160	188.25	184.25	192.25	17.9	17.6	18.2	587.27	80.8	76.8	84.8	1	87
0	11	2670	SCOUT-O3	Schumann et al. (2016), Table 2, upper contrail	M55 Geophysica	MDB	20051116	27751	28721	07:42:31	Tiwi Islands, Australia	Camera				Photo_upper	Soloviev D-30-V12 low bypass turbofan, 93.192 kN thrust each	2	1	37.464	20	1	0.25	184		2670										2160	3180	190.95	190.35	191.55	18.6	18.5	18.7	610.236	71.2	70	72.4	0	64
9	0	1708	SCOUT-O3	deReus et al. (2009)&Schumann et al. (2016), (potential contrail)	M55 Geophysica	MDB	20051130	20600	20750	05:43:20	Tiwi Islands, Australia	FSSP100	2.7			E1	Soloviev D-30-V12 low bypass turbofan, 93.192 kN thrust each	2	1	37.464	20	1.2	0.25	193		1708												191.45			17997			591	78.3			1	76
9	0	1641	SCOUT-O3	deReus et al. (2009)&Schumann et al. (2016), (potential contrail)	M55 Geophysica	MDB	20051130	21140	21180	05:52:20	Tiwi Islands, Australia	FSSP100	2.7			E2	Soloviev D-30-V12 low bypass turbofan, 93.192 kN thrust each	2	1	37.464	20	1.2	0.25	183		1641												186.05			17937			591	77.6			1	157
9	0	2528	SCOUT-O3	deReus et al. (2009)&Schumann et al. (2016), (potential contrail)	M55 Geophysica	MDB	20051130	21300	21330	05:55:00	Tiwi Islands, Australia	FSSP100	2.7			E3	Soloviev D-30-V12 low bypass turbofan, 93.192 kN thrust each	2	1	37.464	20	1.2	0.25	183		2528												189.25						604	72.1			1	95
9	0	2301	SCOUT-O3	deReus et al. (2009)&Schumann et al. (2016),(potential contrail)	M55 Geophysica	MDB	20051130	22863	22913	06:21:03	Tiwi Islands, Australia	FSSP100	2.7			E4	Soloviev D-30-V12 low bypass turbofan, 93.192 kN thrust each	2	1	37.464	20	1.2	0.25	183		2301												189.05						604	72.8			1	107
9	0	4432	SCOUT-O3	deReus et al. (2009)&Schumann et al. (2016), (potential contrail)	M55 Geophysica	MDB	20051130	23318	23378	06:28:38	Tiwi Islands, Australia	FSSP100	2.7			E5	Soloviev D-30-V12 low bypass turbofan, 93.192 kN thrust each	2	1	37.464	20	1.2	0.25	183		4432												192.25						614	68.3			1	75
9	0	4500	SCOUT-O3	deReus et al. (2009)&Schumann et al. (2016), (potential contrail)	M55 Geophysica	MDB	20051130	24952	25052	06:55:52	Tiwi Islands, Australia	FSSP100	2.7			E6	Soloviev D-30-V12 low bypass turbofan, 93.192 kN thrust each	2	1	37.464	20	1.2	0.25	183		4500										3000	7000	189.95						597	74.8			1	89
9	0	3025	SCOUT-O3	Schumann et al. (2016, Geophysica paper)	M55 Geophysica	MDB	20051130	21633	21643	06:00:33	Tiwi Islands, Australia	FSSP100	2.7			E7	Soloviev D-30-V12 low bypass turbofan, 93.192 kN thrust each	2	1	37.464	20	1.2	0.25	183		3025										2995	3055	190.85	190.35	191.35	18.3	18.2	18.4	594	74.1	73.6	74.6		68
9	0	1531	SCOUT-O3	Schumann et al. (2016, Geophysica paper)	M55 Geophysica	MDB	20051130	22120	22135	06:08:40	Tiwi Islands, Australia	FSSP100	2.7			E10	Soloviev D-30-V12 low bypass turbofan, 93.192 kN thrust each	2	1	37.464	20	1.2	0.25	183		1531										1501	1561	192.25	191.75	192.75	18	17.9	18.1	584	77.3	76.8	77.8		75
9	0	3513	SCOUT-O3	Schumann et al. (2016) (potential contrail;trajectory analysis)	M55 Geophysica	MDB	20051129	21960	34680	05:56:12.263000	Tiwi Islands, Australia	trajectroy based				potentials_2911	Soloviev D-30-V12 low bypass turbofan, 93.192 kN thrust each	2	1	37.464	20	1	0.25	184		3513										1604	5422	188.6	187.3	189.9	17.02	16.99	17.05	558.399	87.6	87.1	88.1
9	0	3395	SCOUT-O3	Schumann et al. (2016) (potential contrail;trajectory analysis)	M55 Geophysica	MDB	20051130	18000	25200	04:51:58.248000	Tiwi Islands, Australia	trajectroy based				potentials_3011a	Soloviev D-30-V12 low bypass turbofan, 93.192 kN thrust each	2	1	37.464	20	1	0.25	184		3395										1849	4941	192	190.5	193.5	17.99	17.7	18.28	590.223	75.2	71	79.4		63
9	0	2284	SCOUT-O3	Schumann et al. (2016) (potential contrail;trajectory analysis)	M55 Geophysica	MDB	20051130	47000	60260	12:42:22.092000	Tiwi Islands, Australia	trajectroy based				potentials_3011b	Soloviev D-30-V12 low bypass turbofan, 93.192 kN thrust each	2	1	37.464	20	1	0.25	184		2284										-375	4943	191	190.1	191.9	16.69	16.53	16.85	547.572	92.2	89.5	94.9		59
0	11	5616	SCOUT-O3	Schumann et al. (2016), (potential contrail in anvil)	Falcon	MDB	20051130	27480		07:38:00	Tiwi Islands, Australia	DIAL backscatter				upper anvil	Soloviev D-30-V12 low bypass turbofan, 93.192 kN thrust each	2	1	37.464	20	1	0.25	184		5616										2700	8532	191	189	193	18	18.4	17.6		72	70	74	1
0	11	7956	SCOUT-O3	Schumann et al. (2016), (potential contrail in anvil)	Falcon	MDB	20051130	27540		07:39:00	Tiwi Islands, Australia	DIAL backscatter				lower anvil	Soloviev D-30-V12 low bypass turbofan, 93.192 kN thrust each	2	1	37.464	20	1	0.25	184		7956										5580	10332	188	187	190	17.2	16.6	17.8		85	80	90	1
8	0	1150	CR-AVE	Flores et al. (2006), Lawson et al. (2006)	WB-57F	WB57	20060201	65350	65700	18:14:00	Costa Rica 83°W. equator	CAPS, mainy 1-50 um	1			1February	Pratt Whitney TF-33-11A, the commercial equivalent JT3D-3b	2	1	37.3	24.8	1.76	0.25	201		1150										410	1150	185	184	187				581	79	77	79.2	?	120
10	0	90	CONCERT	Voigt et al. (2010)	Falcon	CRJ2	20081119	42060	42360		Northern Germany	FSSP300_1_20 um	1			CRJ2	CF34‐3B		1	21.21	21	1.26	0.35	218		90										61	122	221.4	221.3	221.5					263				89
10	0	111.5	CONCERT	Jessberger et al. (2013) and Schumann et al. (2013)	Falcon	A319	20081119	33200	34061		Northern Germany	FSSP300_1_20 um	1			A319	CFM56-5B6/P		1	34.1	47	2.4	0.34	224.43		111.5										105	118	217			10.6	10.5	10.7	350	241				91
10	0	85	CONCERT	Jessberger et al. (2013) and Schumann et al. (2013)	Falcon	A343	20081119	31487	31695		Northern Germany	FSSP300_1_20 um	1			A343	CFM56-5C2		1	60.3	171	6.4	0.37	217.64		85										80	90	217			10.6	10.5	10.7	351	242				94
10	0	109	CONCERT	Jessberger et al. (2013) and Schumann et al. (2013)	Falcon	A380	20081119	44040	45020		Northern Germany	FSSP300_1_20 um	1			A380	Trent970-84		1	79.8	508	15.9	0.39	251.58		109										102	115	218			10.6	10.3	10.7	350	241				92
10	0	240	CONCERT	Gayet et al. (2012)	Falcon	A380	20081119	45000			Northern Germany	FSSP300_0.9_20 um	0.9			A380	Trent970-84		1	79.8	508	15.9	0.39	251.58		240										190	300	216.6			10.6	10.3	10.7	350	238				98
0	10	4000	Fallstreak 2	Atlas and Wang (2010)	Ground	Airliners	20081205	73800			near NASA Goddard,US, 39°N, 76.9°W															4000										1000	8000	215							250				120
11	0	420	COSIC, B587	Jones et al. (2012)	BAe146	BAe146	20110319	55105	55140	1500	UK_NorthSea	CAS_DPOL_0.6_50 um_+_CIP_GS_15_900_um	0.9	50		B587	ALF 502 turbofan engines	4	1	28.6	35	3.1	0.265	220		420												213.32							273				109
11	0	600	COSIC, B587	Jones et al. (2012)	BAe146	BAe146	20110319	55590	55605	1500	UK_NorthSea	CAS_DPOL_0.6_50 um_+_CIP_GS_15_900_um	0.9	50		B587	ALF 502 turbofan engines	4	1	28.6	35	3.1	0.265	220		600												213.36							273				109
11	0	540	COSIC, B587	Jones et al. (2012)	BAe146	BAe146	20110319	55710	55750	1500	UK_NorthSea	CAS_DPOL_0.6_50 um_+_CIP_GS_15_900_um	0.9	50		B587	ALF 502 turbofan engines	4	1	28.6	35	3.1	0.265	220		540												213.63							273				122.5
11	0	720	COSIC, B587	Jones et al. (2012)	BAe146	BAe146	20110319	56010	56040	1500	UK_NorthSea	CAS_DPOL_0.6_50 um_+_CIP_GS_15_900_um	0.9	50		B587	ALF 502 turbofan engines	4	1	28.6	35	3.1	0.265	220		720												213.47							273				115.5
11	0	1260	COSIC, B587	Jones et al. (2012)	BAe146	BAe146	20110319	56025	56190	1500	UK_NorthSea	CAS_DPOL_0.6_50 um_+_CIP_GS_15_900_um	0.9	50		B587	ALF 502 turbofan engines	4	1	28.6	35	3.1	0.265	220		1260												213.43							273				114.5
11	0	600	COSIC, B587	Jones et al. (2012)	BAe146	BAe146	20110319	56205	56235	1500	UK_NorthSea	CAS_DPOL_0.6_50 um_+_CIP_GS_15_900_um	0.9	50		B587	ALF 502 turbofan engines	4	1	28.6	35	3.1	0.265	220		600												213.4							273				114
11	0	840	COSIC, B587	Jones et al. (2012)	BAe146	BAe146	20110319	56625	56685	1500	UK_NorthSea	CAS_DPOL_0.6_50 um_+_CIP_GS_15_900_um	0.9	50		B587	ALF 502 turbofan engines	4	1	28.6	35	3.1	0.265	220		840												213.48							273				124.5
11	0	1440	COSIC, B587	Jones et al. (2012)	BAe146	BAe146	20110319	56030	57335	1500	UK_NorthSea	CAS_DPOL_0.6_50 um_+_CIP_GS_15_900_um	0.9	50		B587	ALF 502 turbofan engines	4	1	28.6	35	3.1	0.265	220		1440												213.48							273				123.5
11	0	1800	COSIC, B587	Jones et al. (2012)	BAe146	BAe146	20110319	56820	56980	1500	UK_NorthSea	CAS_DPOL_0.6_50 um_+_CIP_GS_15_900_um	0.9	50		B587	ALF 502 turbofan engines	4	1	28.6	35	3.1	0.265	220		1800										660	1800	213.39							273				117
10	0	120	CONCERT2011	Kaufmann et al. (2014)+ new data analysis	Falcon	B77W	20110916	58020	59030	16.1167	N_Germany_52.3N,13.2E	PNephelometer				B77W	GE90	2	1	64.8	239.6	7.82083	0.33	248.624		120										90	130	218	217	218	11.224	11.024	11.224	360	227.3	227.2	227.8		89
10	0	80	CONCERT2011	Kaufmann et al. (2014)+new data analysis	Falcon	A321	20110916	60025	60205	16.6736	N_Germany_52.3N,13.2E	PNephelometer+FSSP300, 0.4-50 um	0.4	50		A321	IEA2500-A1	2	1	34.1	77.5	3.62	0.33	230		80										70	110	221	219	222	10.71	10.61	10.71	350	238.4	238.4	244	1	105
10	0	160	CONCERT2011	Kaufmann et al. (2014)+ new data analysis	Falcon	B77W	20110924	40390	40600	11.2194	N_Germany_51.6N,7.7E	PNephelometer				B77W		2	1	64.8	240.6	7.82083	0.33	248.624		160										140	180	218	217	219	11.224	11.024	11.224	360	227.3	226.8	227.4		90
0	12	300	WECARE-Camera	Schumann and Hempel (2013)	Groundbased Cameras	E190	20121103	31200			Munich	Cameras				Schumann& Hempel(2013)			1	28.72	41	2.339	0.33			300												214.85			11				216.545				90
0	12	900	WECARE-Camera	Schumann and Hempel (2013)	Groundbased Cameras	E190	20121103	31200			Munich	Cameras							1	28.72	41	2.339	0.33			900												214.85			11				216.545				90
0	12	1080	WECARE-Camera	Schumann and Hempel (2013)	Groundbased Cameras	B744	20121103	31200			Munich	Cameras							1	64.44	285.7	11.04	0.33			1080												218.55			10.55				238.348				110
0	12	1680	WECARE-Camera	Schumann and Hempel (2013)	Groundbased Cameras	B744	20121103	31200			Munich	Cameras							1	64.44	285.7	11.04	0.33			1680												218.55			10.55				238.348				110
0	12	780	WECARE-Camera	Schumann and Hempel (2013)	Groundbased Cameras	A319	20121103	31200			Munich	Cameras							1	34.1	60	2.671	0.33			780												214.55			11.26				206.539				110
0	12	1380	WECARE-Camera	Schumann and Hempel (2013)	Groundbased Cameras	A319	20121103	31200			Munich	Cameras							1	34.1	60	2.671	0.33			1380												214.55			11.26				206.539				110
0	12	480	WECARE-Camera	Schumann and Hempel (2013)	Groundbased Cameras	E190	20121103	31200			Munich	Cameras							1	28.72	41	2.339	0.33			480												233.15			8.81				316.682				90
0	12	1080	WECARE-Camera	Schumann and Hempel (2013)	Groundbased Cameras	E190	20121103	31200			Munich	Cameras							1	28.72	41	2.339	0.33			1080												233.15			8.81				272.558				90
12	0	6533.02	ML-CIRRUS	Voigt et al., 2016	HALO	B772	20140326	36144	36162	10:02:00	NFC, West of England	CAS-DPOL, 1-50 um	1	50		ML-CIRRUS			1	60.93	200	7.6	0.36	230		6533.02										6430	5640	211			11.3	11	11.3	380	206		215		102
12	0	25780	ML-CIRRUS	Voigt et al., 2016	HALO	F900	20140326	36144	36162	10:02:00	NFC, West of England	CAS-DPOL, 1-50 um	1	50		ML-CIRRUS			1	19.33	15.4	0.7	0.36	230		25780										6430	5640	211			11.3	11	11.3	370	206		215		102
[truncated: 75 more columns]
