# Supplementary material for: Properties of individual contrails: a compilation of observations and some comparisons
Source: Copernicus journal article supplement (doi:10.5194/acp-17-403-2017), 2017-01-10
Supplement: Supplementary file 3 [file CoCiP_CAM_percentiles.xlsx]

## Sheet: Tabelle1
NR_Zice_cm3	age/s	y00_Zice_cm3	y25_Zice_cm3	y50_Zice_cm3	y75_Zice_cm3	y100_Zice_cm3			y00_ext/km-1	y25_ext/km-1	y50_ext/km-1	y75_ext/km-1	y100_ext/km-1			y00_IWC/mgm3	y25_IWC/mgm3	y50_IWC/mgm3	y75_IWC/mgm3	y100_IWC/mgm3			y00_DEPTHW	y25_DEPTHW	y50_DEPTHW	y75_DEPTHW	y100_DEPTHW			y00_WIDTHW	y25_WIDTHW	y50_WIDTHW	y75_WIDTHW	y100_WIDTHW			y00_Rmu	y25_Rmu	y50_Rmu	y75_Rmu	y100_Rmu			y00_TAUW	y25_TAUW	y50_TAUW	y75_TAUW	y100_TAUW
9777	183.742	9.5383	137.466	274.678	592.723	4521.34			4.2132e-05	1.7642	4.6	8.5929	23.0665			6.8808e-05	1.2166	5.3366	13.8411	79.8527			45.2894	73.9924	106.267	166.547	573.477			0.9027	60.4754	140.503	280.172	2084.3			0.0333	0.9162	1.7022	2.7428	11.9859			3.7701e-06	0.1075	0.3365	0.8748	5.2227
191	225.92	14.9877	101.915	234.242	477.921	1356.22			0.2222	1.8449	4.6317	11.1212	19.4367			0.0483	1.5832	6.0317	20.4683	59.0419			60.7161	72.7057	102.711	158.247	285.155			33.8813	81.0117	149.244	311.343	741.874			0.435	1.0713	1.877	3.2603	6.7441			1e-05	0.1066	0.3471	1.1776	3.484
28	267.14	51.0995	70.4623	149.221	311.881	814.922			0.6201	2.0061	5.3834	11.5316	14.9338			0.3069	1.9507	7.9385	27.0062	41.7421			66.7464	82.7877	122.386	241.055	258.747			76.893	104.864	204.844	534.407	726.12			0.6579	1.1238	2.5343	3.5202	5.969			2e-05	0.0835	0.4748	1.2102	3.5
10	323.464	12.9934	12.9934	71.496	429.804	639.861			2.8578	2.8578	4.9053	6.8958	8.2883			2.0692	2.0692	10.1964	31.2065	36.4654			71.3906	71.3906	101.955	183.428	215.577			88.2204	88.2204	177.366	333.447	373.258			0.9442	0.9442	3.3361	8.5335	8.5511			0.0001	0.2183	0.3394	0.5055	4
9559	366.871	2.273	58.1514	140.636	321.682	2466.18			0.001524	1.433	3.5746	6.508	19.6892			0.00091631	1.2023	5.2095	13.7469	84.3288			58.0971	89.7703	127.258	223.209	761.726			1.3406	98.2832	236.858	513.729	6335.89			0.0922	1.1026	2.0749	3.6011	20.216			0.00011296	0.092	0.2975	0.8377	6.2482
134	447.012	2.4829	24.207	76.4631	199.445	920.598			0.2389	1.517	4.0428	6.8376	12.0395			0.2319	1.9504	8.2364	22.9775	57.6588			74.4255	89.1352	138.883	244.06	427.75			39.6655	138.542	281.085	601.456	1360.56			0.812	1.642	2.9742	5.7374	14.7081			0.0003	0.1089	0.3252	0.8434	6
9139	547.7	1.8212	32.705	87.6113	218.553	1563.4			0.0061116	1.2751	3.045	5.4092	14.9589			0.0023756	1.2236	5.1705	13.4919	87.5244			68.756	102.382	147.16	272.323	892.837			1.802	135.988	332.424	772.796	8232.2			0.1479	1.2554	2.4236	4.3403	17.1605			0.0005243	0.0846	0.28	0.7978	6.2667
465	628.029	0.7177	17.5601	57.4556	142.728	640.881			0.1702	1.514	3.2494	5.585	9.5724			0.051	1.9373	7.2608	20.1447	72.7493			83.6454	103.032	149.134	282.387	532.994			23.5566	169.39	368.869	840.077	2052.25			0.4476	1.6095	3.1683	6.1826	29.7722			0.0087539	0.0986	0.2943	0.8084	2.267
9367	732.66	0.0368	20.1857	59.9076	160.651	1058.98			0.0102	1.1494	2.6621	4.692	10.9443			0.003544	1.2565	5.1911	13.4898	85.216			78.3682	112.891	162.902	320.523	1021.97			2.1598	174.8	433.878	1046.99	8732.48			0.1682	1.4054	2.7812	5.1241	65.3829			0.0010585	0.0812	0.2665	0.7723	6.5458
9143	911.935	0.1911	13.7077	43.9017	124.512	839.543			0.00065571	1.0605	2.3975	4.1909	10.2255			0.0003876	1.2719	5.1957	13.4873	82.646			85.0035	122.351	179.537	362.024	1131.05			2.5086	212.503	538.901	1356.11	11776.6			0.0939	1.5357	3.0772	5.8126	38.4076			6.3635e-05	0.0779	0.2571	0.7543	5.8119
9365	1090.27	0.0862	9.794	33.5898	98.6897	725.232			0.0029962	0.9541	2.1725	3.788	8.7831			0.00099975	1.212	5.1749	13.5491	85.9715			91.6256	131.183	195.086	399.634	1216.08			2.8347	252.144	646.979	1709.88	8816.21			0.1772	1.6305	3.3597	6.5446	63.8004			0.00026569	0.0754	0.2464	0.7376	4.3965
9791	1275	0.0384	6.8477	26.0494	80.6909	684.334			0.0146	0.8883	1.9752	3.4277	9.5058			0.003344	1.2565	5.1291	13.7231	96.6747			97.3419	139.406	211.077	433.779	1086.02			3.1418	288.471	760.526	2076.73	20250.1			0.2091	1.7548	3.6588	7.3688	82.7294			0.0014478	0.0736	0.2355	0.721	4.7373
16729	1529.07	0.002633	4.9282	20.0483	65.2814	758.771			0.00046908	0.7935	1.7805	3.0941	8.2303			0.00032046	1.1509	5.0405	13.3919	102.567			103.586	151.068	232.14	484.334	1244.05			3.445	340.54	929.28	2625.71	29825.3			0.0807	1.858	3.9586	8.1164	156.171			4.359e-05	0.0696	0.2289	0.6961	5.4186
12105	1805.69	0.001122	3.1129	13.8147	47.1701	652.553			0.0040274	0.7255	1.5817	2.7119	7.0649			0.0010958	1.2355	5.0609	13.6331	123.919			115.592	161.328	247.503	520.298	1400.62			8.5944	391.133	1110.22	3251.7	35300.7			0.2313	2.0698	4.5123	9.5975	306.355			0.00050695	0.0665	0.2134	0.6384	5.1979
19018	2105.18	0.0018344	2.2836	10.7177	39.4945	483.717			0.00019189	0.6533	1.4331	2.4763	6.1018			0.00012162	1.1957	4.98	13.3173	105.969			121.421	174.124	273.616	573.356	1506.43			9.0861	457.069	1338.93	4018.66	46569.7			0.0873	2.1748	4.8784	10.5439	227.131			2.4338e-05	0.0645	0.2108	0.6327	5.0613
25238	2525.49	0.0011338	1.4511	7.6136	29.8336	343.75			0.00034766	0.5768	1.2658	2.1879	5.3173			0.00017626	1.1764	5.0329	13.395	95.0544			130.061	189.889	307.693	643.358	1720.48			9.8386	564.783	1721.21	5164.86	74758.4			0.1105	2.3555	5.4732	12.2289	279.468			3.3089e-05	0.0618	0.2033	0.6037	4.0127
28161	3046.33	0.0010169	0.841	5.0657	21.3146	880.274			0.00031317	0.5067	1.1032	1.8987	4.7153			0.00010904	1.1818	5.0009	13.6397	94.8671			134.233	209.433	341.868	711.317	1931.59			10.9358	682.21	2190.31	6664.16	80000			0.1417	2.6293	6.2697	14.976	250.336			5.6281e-05	0.0597	0.1901	0.5629	3.8403
34968	3589.08	0.0010527	0.4129	3.149	16.1896	950.938			0.0040205	0.4661	0.9606	1.6466	4.3891			0.0010751	1.3514	5.1635	14.1343	133.34			158.594	230.447	396.949	889.919	3999			10.9541	954.077	2968.35	8934.71	80000			0.2372	3.03	7.4496	19.2171	309.342			0.00037671	0.0631	0.194	0.5774	5.2645
35397	4238.98	0.0010087	0.1237	1.5382	11.1834	242.232			0.0035634	0.3886	0.76	1.2476	3.2118			0.00081166	1.3506	5.2389	14.9998	121.833			181.113	253.412	583.334	1603.24	3999			136.732	1392.49	4109.99	11139.9	63614.3			0.2551	3.344	9.5267	29.8862	308.921			0.00043283	0.0682	0.2421	0.772	4.2673
42099	5045.37	0.0010021	0.0771	0.9661	7.721	163.498			0.0038138	0.3313	0.6445	1.0544	2.4944			0.00084408	1.312	5.1644	14.6279	110.239			184.371	281.301	705.394	1894.55	3999			124.274	1711.69	4873.71	12764.2	50662.7			0.2513	3.7224	11.1052	34.867	283.912			0.00050317	0.0683	0.2524	0.8071	4.5438
48907	6015.83	0.0010024	0.0468	0.6098	5.3041	144.53			0.0010614	0.2626	0.5402	0.9022	2.5082			0.00032857	1.1873	4.8951	13.7593	107.009			204.004	314.883	798.425	2034.11	3999			261.227	2042.16	5743.93	15214.4	66616.1			0.2162	4.126	12.6397	40.0276	283.035			0.00018108	0.0632	0.2413	0.763	4.8681
51456	7096.85	0.0010019	0.0304	0.3948	3.7598	73.5579			0.00085949	0.2164	0.4589	0.7841	1.9135			0.0006055	1.1504	4.6659	13.2963	102.382			225.339	355.53	914.657	2259.01	3999			287.287	2431.55	6947.69	18247.7	80000			0.457	4.6735	14.351	44.9475	276.572			0.00053567	0.0633	0.24	0.7233	3.4105
50523	8368.26	0.0010001	0.0217	0.274	2.8963	80.931			0.0017863	0.165	0.3706	0.6521	1.8553			0.0016893	0.9401	4.0321	11.3176	58.3411			259.084	393.65	1100.75	2728.27	3999			443.221	3083.96	8800.41	21864.9	80000			0.3351	4.7834	15.4073	47.027	230.162			0.00028777	0.0615	0.2331	0.6733	3.8939
52117	9993.56	0.0010024	0.0212	0.2232	2.155	71.4213			0.00041623	0.1323	0.3084	0.5602	1.5406			0.00010376	0.7311	3.3786	9.6428	51.0403			275.839	438.189	1179.81	2774.12	3999			419.991	3500.81	9465.33	22975.3	80000			0.2646	5.0028	15.4293	44.3566	223.706			6.9245e-05	0.0536	0.2118	0.6081	2.4826
36723	11805	0.0010035	0.0235	0.2099	1.9136	43.1443			0.00041028	0.1004	0.2645	0.4921	1.4557			0.0003803	0.5086	2.7392	8.0839	48.0691			316.371	484.196	1237.26	2834.98	3999			561.792	3967.29	10952	26644.7	80000			0.3134	4.7616	14.4308	40.916	221.475			0.00036085	0.046	0.1873	0.5511	2.8634
31214	14018	0.0010013	0.0284	0.2146	1.6202	43.1616			0.00036713	0.0762	0.221	0.4243	1.3692			0.00012412	0.3288	2.0602	6.4948	50.3688			336.088	526.418	1238.59	2787.87	3999			689.296	4295.64	11299	27406.7	80000			0.3186	4.4588	12.9571	34.9886	230.725			0.00015471	0.0351	0.1602	0.4928	1.9031
20314	16629.3	0.0010427	0.0318	0.2187	1.3959	19.7649			0.00028298	0.0534	0.1816	0.3744	1.1554			7.3751e-05	0.2017	1.5194	5.2747	42.4936			371.556	575.313	1227.22	2785.55	3999			715.616	4807.32	12181.3	29103.3	80000			0.1982	4.15	11.3916	31.2055	196.31			9.9894e-05	0.0252	0.1332	0.4305	2.0167
13625	19613.4	0.0010351	0.0354	0.2283	1.2267	21.6661			0.00031625	0.0388	0.1458	0.3211	1.0334			0.00029916	0.1213	1.0277	4.2872	34.3343			417.455	620.565	1229.05	2762.76	3999			1100.12	5202.47	13381.1	32347.9	80000			0.4399	3.7166	9.8467	27.6916	173.4			0.00022535	0.0184	0.1039	0.3893	1.7109
8072	23309.8	0.0012887	0.0495	0.2436	1.1557	19.0242			0.0003613	0.0315	0.1179	0.2942	0.7522			7.7811e-05	0.0921	0.7023	3.4949	39.9282			455.228	685.449	1266.54	2691.45	3999			1273.95	5659.66	13834.2	33208.7	80000			0.3748	3.5064	8.4166	23.0827	165.197			0.00030548	0.0159	0.0849	0.3362	1.1715
4221	27443.9	0.0027336	0.0617	0.257	1.0445	20.679			0.0001315	0.0245	0.0856	0.2474	0.6825			3.2748e-05	0.066	0.4333	2.4122	11.9371			539.493	744.503	1254.25	2587.23	3999			1177.32	6085.88	14863.6	37186	80000			0.265	3.2521	7.1408	18.6266	83.515			5.6128e-05	0.0136	0.062	0.2845	1.2538
584	31851.5	0.0162	0.0614	0.2076	1.0101	6.4976			0.0034082	0.022	0.0768	0.2134	0.5571			0.0070137	0.0644	0.4025	1.9663	5.6845			574.426	772.944	1347.1	2983.45	3999			1951.3	6327.51	15671.9	38200.5	80000			1.2371	3.4283	7.4762	16.5606	40.1119			0.0015616	0.0122	0.0641	0.2719	0.9537
