# Supplementary material for: Properties of individual contrails: a compilation of observations and some comparisons
Source: Copernicus journal article supplement (doi:10.5194/acp-17-403-2017), 2017-01-10
Supplement: Supplementary file [file acp-17-403-2017-supplement-title-page.pdf › acp-17-403-2017-supplement-title-page.pdf]

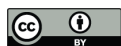

## *Supplement of*

# **Properties of individual contrails: a compilation of observations and some comparisons**

**Ulrich Schumann et al.**

*Correspondence to:* Ulrich Schumann ([ulrich.schumann@dlr.de](mailto:ulrich.schumann@dlr.de))

- [acp-17-403-2017-supplement-title-page.pdf](#)
- [ACTA\\_2008\\_2009.txt](#)
- [ACTA\\_tau\\_percentiles.xlsx](#)
- [Aircraft\\_types\\_Atlas\\_2006.txt](#)
- [COLI\\_Nov\\_2016.xlsx](#)
- [CSAE\\_Table.txt](#)
- [CoCiP\\_CAM\\_percentiles.xlsx](#)
- [README.txt](#)
- [falcon\\_1991-04-09\\_f1797a\\_track.nas](#)

The copyright of individual parts of the supplement might differ from the CC-BY 3.0 licence.
